# Supplementary material for: A Genome-Wide Association Study Identifies Susceptibility Variants for Type 2 Diabetes in Han Chinese
Source: PLoS Genet. 2010 Feb 19;6(2):e1000847. doi: 10.1371/journal.pgen.1000847 (PMC2824763; doi:10.1371/journal.pgen.1000847)
Supplement: Table S3 — Association results in stage 1. (0.05 MB DOC) [file pgen.1000847.s008.doc]

**Table S3. Association results in stage 1.**

|  |  | *P* best |  | *P* trend | *P*Permutation | *P*PCA-correction | *P*Genomic Control |
| --- | --- | --- | --- | --- | --- | --- | --- |
| Chr | SNP |  |  |  | (trend) | ( additive) | ( trend) |
| 4 | rs9985652 | 3.87x10-6 | (dom) | 9.30x10-4 | 6.62x10-4 | 0.001 | 0.001 |
| 4 | rs2044844 | 3.87x10-6 | (rec) | 9.30x10-4 | 8.72x10-4 | 0.002 | 0.001 |
| 16 | rs7192960 | 4.29x10-6 | (rec) | 7.66x10-6 | 9.98x10-6 | 1.35x10-5 | 1.64x10-5 |
| 20 | rs7361808 | 4.36x10-6 | (geno) | 2.30x10-4 | 2.54x10-4 | 1.55x10-4 | 3.89x10-4 |
| 10 | rs1751960 | 9.56x10-6 | (allele) | 1.13x10-5 | 6.65x10-6 | 2.87x10-6 | 2.35x10-5 |
| 1 | rs4845624 | 5.85x10-6 | (trend) | 5.85x10-6 | 5.85x10-6 | 1.18x10-5 | 1.27x10-5 |
| 17 | rs391300 | 7.61x10-6 | (dom) | 9.00x10-5 | 7.90x10-5 | 5.68x10-5 | 1.62x10-4 |
| 17 | rs4523957 | 3.24x10-4 | (trend) | 3.24x10-4 | 3.47x10-4 | 2.06x10-4 | 5.35x10-4 |
| 13 | rs648538 | 8.28x10-6 | (rec) | 2.92x10-4 | 4.06x10-4 | 6.19x10-4 | 4.86x10-4 |
| 9 | rs17584499 | 2.36x10-5 | (rec) | 1.41x10-4 | 1.03x10-4 | 3.50x10-4 | 2.47x10-4 |
| 11 | rs231361 | 1.27x10-4 | (allele) | 1.49x10-4 | 1.93x10-4 | 2.46x10-4 | 2.59x10-4 |
| 11 | rs231359 | 4.20x10-4 | (allele) | 4.56x10-4 | 6.97x10-4 | 7.40x10-4 | 9.06x10-4 |
| 11 | rs2237895 | 2.92x10-4 | (trend) | 2.92x10-4 | 3.45x10-4 | 0.001 | 4.86x10-4 |
